# Supplementary material
Source: publisher site journal article supplement (https://www.dovepress.com/article/214787)
Supplement: Supplementary file 1 [file get_supplementary_file.php]

### Supplementary Table 1

Analysis of the correlation coefficients regarding the association between age of TS subjects and anthropometric, bioimpedance, cardiometabolic variables and the atherogenic indexes.

|                                    | Age    |                |              |               |
|------------------------------------|--------|----------------|--------------|---------------|
|                                    | R      | R <sup>2</sup> | 95% CI       | p             |
| <b>BMI</b>                         | 0.29   | 0.087          | 0,09 - 0,47  | <b>0.0054</b> |
| <b>WC</b>                          | 0.26   | 0.07           | 0.058 - 0.45 | <b>0,0128</b> |
| <b>WHR</b>                         | 0.27   | 0.071          | 0.06 – 0.45  | <b>0.0123</b> |
| WHtR                               | 0.056  | 0.0031         | -0,16 - 0.26 | 0,6038        |
| FFM                                | -0.024 | 0.00057        | -0.23 - 0.19 | 0.8258        |
| %FFM                               | -0.17  | 0.03           | -0.37 – 0.04 | 0.1073        |
| <b>FM</b>                          | 0.36   | 0.13           | 0.16 - 0.53  | <b>0.0006</b> |
| <b>%FM</b>                         | 0.38   | 0.14           | 0.18 - 0.55  | <b>0.0003</b> |
| <b>FFM to FM Ratio</b>             | -0.22  | 0.047          | -0.01 – 0.41 | <b>0.0431</b> |
| TBW                                | -0.075 | 0.0057         | -0.28 – 0.14 | 0.486         |
| <b>%TBW</b>                        | -0.28  | 0.08           | -0.47 - -0.1 | <b>0.0075</b> |
| Fasting Plasma Glucose             | 0.12   | 0.014          | -0.09 – 0.3  | 0.279         |
| <b>Triglycerides</b>               | 0.3    | 0.089          | 0.1 – 0.48   | <b>0.0046</b> |
| <b>Total Cholesterol</b>           | 0.27   | 0.074          | 0.07 – 0.46  | <b>0.0102</b> |
| <b>LDL-c (mg/ml)</b>               | 0.21   | 0.044          | 0.001 – 0.4  | <b>0.0487</b> |
| HDL-c (mg/ml)                      | -0.12  | 0.014          | -0.32 – 0.1  | 0.2786        |
| <b>TC to HDL-c Ratio</b>           | 0.37   | 0.13           | 0.17 - 0.54  | <b>0.0004</b> |
| <b>Atherogenic Index of Plasma</b> | 0.32   | 0.1            | 0.12 - 0.5   | <b>0.0021</b> |
| <b>LDL-c to HDL-c Ratio</b>        | 0.29   | 0.084          | 0.085 - 0.47 | <b>0.0062</b> |
| <b>No-HDL-c to HDL-c Ratio</b>     | 0.37   | 0.13           | 0.17 – 0.54  | <b>0.0004</b> |

## Supplementary Table 2

Analysis of the correlation coefficients regarding the association between the anthropometric variables and cardiometabolic variables and the atherogenic indexes in TS Subjects with Overweight/Obesity

|                             | BMI         |               | WC          |               | WHR         |               | WHtR         |                   |
|-----------------------------|-------------|---------------|-------------|---------------|-------------|---------------|--------------|-------------------|
|                             | <i>r</i>    | <i>p</i>      | <i>r</i>    | <i>p</i>      | <i>R</i>    | <i>p</i>      | <i>r</i>     | <i>p</i>          |
| Fasting Plasma Glucose      | 0.29        | 0.0552        | 0.25        | 0.1002        | -0.018      | 0.9067        | 0.26         | 0.0826            |
| Triglycerides               | 0.095       | 0.5409        | 0.0033      | 0.9832        | -0.078      | 0.6136        | 0.03         | 0.8448            |
| Total Cholesterol           | 0.27        | 0.0792        | <b>0.37</b> | <b>0.0129</b> | 0.22        | 0.1457        | <b>0.38</b>  | <b>0.0116</b>     |
| LDL-c                       | <b>0.35</b> | <b>0.0211</b> | <b>0.5</b>  | <b>0.0006</b> | <b>0.44</b> | <b>0.0029</b> | <b>0.5</b>   | <b>&lt;0.0005</b> |
| HDL-c                       | -0.12       | 0.4243        | 0.011       | 0.9442        | 0.083       | 0.5932        | <b>0.016</b> | <b>0.9175</b>     |
| TC to HDL-c Ratio           | 0.26        | 0.0929        | 0.19        | 0.2128        | -0.027      | 0.863         | 0.2          | 0.1873            |
| Atherogenic Index of Plasma | -0.076      | 0.6229        | -0.07       | 0.6525        | -0.17       | 0.2713        | -0.051       | 0.7447            |
| LDL-c to HDL-c Ratio        | <b>0.34</b> | <b>0.0246</b> | <b>0.4</b>  | <b>0.0067</b> | <b>0.33</b> | <b>0.0306</b> | <b>0.41</b>  | <b>0.0064</b>     |
| No-HDL-c to HDL-c Ratio     | 0.26        | 0.0929        | 0.19        | 0.2128        | -0.027      | 0.863         | 0.2          | 0.1873            |

*r* = correlation coefficient; values in **bold** and *italic* represent significant values; TS: Turner syndrome; MetS: Metabolic Syndrome; TC: Total Cholesterol; HDL-c: High Density Lipoprotein cholesterol; LDL-c: Low Density Lipoprotein cholesterol; BMI: Body Mass Index; WC: Waist Circumference; WHR: Waist to Hip Ratio; WHtR: Waist to Height Ratio. The No-HDL-c is calculated as CT *minus* HDL-c. The Atherogenic Index of the Plasma is calculated through the formula of log(Triglycerides (mg/ml)/HDLc (mg/ml)). *Pearson* correlation or *Spearman* correlation (\*) test for the correlation between variables, considering significance when  $p < 0.05$

### Supplementary Table 3

Analysis of the correlation coefficients regarding the association between the bioimpedance parameters and cardiometabolic variables and the atherogenic indexes in TS Subjects with Overweight/Obesity

|                             | FM          |               | PFM         |               | FFM          |                   | PFFM         |                   | FFM to FM Ratio |                   |
|-----------------------------|-------------|---------------|-------------|---------------|--------------|-------------------|--------------|-------------------|-----------------|-------------------|
|                             | <i>r</i>    | <i>p</i>      | <i>r</i>    | <i>P</i>      | <i>r</i>     | <i>p</i>          | <i>r</i>     | <i>p</i>          | <i>r</i>        | <i>p</i>          |
| Fasting Plasma Glucose      | <b>0.33</b> | <b>0.0291</b> | 0.27        | 0.0785        | -0.13        | 0.3914            | -0.25        | 0.096             | 0.27            | 0.0742            |
| Triglycerides               | 0.1         | 0.5017        | 0.17        | 0.2705        | 0.12         | 0.424             | 0.038        | 0.8045            | -0.047          | 0.7613            |
| Total Cholesterol           | 0.27        | 0.0754        | 0.2         | 0.1961        | <b>-0.45</b> | <b>0.0024</b>     | <b>-0.49</b> | <b>0.0007</b>     | <b>0.44</b>     | <b>0.0026</b>     |
| LDL-c                       | <b>0.36</b> | <b>0.0159</b> | 0.26        | 0.0934        | <b>-0.68</b> | <b>&lt;0.0001</b> | -0.71        | <0.0001           | <b>0.67</b>     | <b>&lt;0.0001</b> |
| HDL-c                       | 0.17        | 0.267         | -0.17       | 0.2671        | -0.22        | 0.1438            | -0.1         | 0.5094            | 0.046           | 0.7647            |
| TC to HDL-c Ratio           | 0.13        | 0.4063        | <b>0.31</b> | <b>0.0387</b> | -0.13        | 0.4063            | -0.25        | 0.1043            | -0.24           | 0.109             |
| Atherogenic Index of Plasma | 0.22        | 0.1592        | 0.18        | 0.236         | 0.22         | 0.1592            | 0.11         | 0.4678            | -0.11           | 0.484             |
| LDL-c to HDL-c Ratio        | <b>-0.5</b> | <b>0.0006</b> | <b>0.32</b> | <b>0.0336</b> | <b>-0.5</b>  | <b>0.0006</b>     | <b>-0.57</b> | <b>&lt;0.0001</b> | <b>-0.56</b>    | <b>&lt;0.0001</b> |
| No-HDL-c to HDL-c Ratio     | 0.13        | 0.4502        | <b>0.31</b> | <b>0.0387</b> | -0.13        | 0.4063            | -0.25        | 0.1043            | 0.24            | 0.109             |

*r* = correlation coefficient; values in **bold** and *italic* represent significant values; TS: Turner syndrome; MetS: Metabolic Syndrome; TC: Total Cholesterol; HDL-c: High Density Lipoprotein cholesterol; LDL-c: Low Density Lipoprotein cholesterol; FFM: Free fat mass; PFFM: Percentage of Free Fat Mass; FM: Fat Mass; PFM: Percentage of Fat Mass. TBW: Total Body Water. PTBW: Percentage of Total Body Water. The No-HDL-c is calculated as CT *minus* HDL-c. The Atherogenic Index of the Plasma is calculated through the formula of log(Triglycerides (mg/ml)/HDLc (mg/ml)). *Pearson* correlation or *Spearman* correlation (\*) test for the correlation between variables, considering significance when  $p < 0.05$

### Supplementary Table 4

Analysis of the correlation coefficients regarding the association between the anthropometric variables and cardiometabolic variables and the atherogenic indexes in TS Subjects with MetS

|                             | BMI           |               | WC            |               | WHR           |               | WHtR          |                   |
|-----------------------------|---------------|---------------|---------------|---------------|---------------|---------------|---------------|-------------------|
|                             | <i>r</i>      | <i>P</i>      | <i>r</i>      | <i>p</i>      | <i>r</i>      | <i>p</i>      | <i>r</i>      | <i>p</i>          |
| Fasting Plasma Glucose      | 0.02746       | 0.8756        | 0.002249      | 0.9898        | -0.0969       | 0.5798        | 0.006086      | 0.9723            |
| Triglycerides               | 0.1069        | 0.5411        | -0.03601      | 0.8373        | -0.1294       | 0.4587        | 0.01081       | 0.9509            |
| Total Cholesterol           | <b>0.4469</b> | <b>0.0071</b> | <b>0.5143</b> | <b>0.0016</b> | <b>0.4351</b> | <b>0.009</b>  | <b>0.5185</b> | <b>0.0014</b>     |
| LDL-c                       | <b>0.5713</b> | <b>0.0003</b> | <b>0.5895</b> | <b>0.0002</b> | <b>0.4189</b> | <b>0.0123</b> | <b>0.6261</b> | <b>&lt;0.0001</b> |
| HDL-c                       | 0.194         | 0.2641        | 0.2829        | 0.0996        | 0.2609        | 0.1301        | <b>0.3858</b> | <b>0.0221</b>     |
| TC to HDL-c Ratio           | 0.08217       | 0.6389        | 0.056         | 0.7493        | -0.07097      | 0.6854        | 0.0761        | 0.6639            |
| Atherogenic Index of Plasma | -0.3251       | 0.0567        | -0.2072       | 0.2325        | -0.0516       | 0.7685        | -0.1655       | 0.3421            |
| LDL-c to HDL-c Ratio        | <b>0.3383</b> | <b>0.0468</b> | <b>0.3398</b> | <b>0.041</b>  | 0.2225        | 0.199         | <b>0.3472</b> | <b>0.041</b>      |
| No-HDL-c to HDL-c Ratio     | 0.08217       | 0.6389        | 0.056         | 0.7493        | -0.07097      | 0.6854        | 0.0761        | 0.6639            |

*r* = correlation coefficient; values in **bold** and *italic* represent significant values; TS: Turner syndrome; MetS: Metabolic Syndrome; TC: Total Cholesterol; HDL-c: High Density Lipoprotein cholesterol; LDL-c: Low Density Lipoprotein cholesterol; BMI: Body Mass Index; WC: Waist Circumference; WHR: Waist to Hip Ratio; WHtR: Waist to Height Ratio. The No-HDL-c is calculated as CT *minus* HDL-c. The Atherogenic Index of the Plasma is calculated through the formula of log(Triglycerides (mg/ml)/HDLc (mg/ml)). *Pearson* correlation or *Spearman* correlation (\*) test for the correlation between variables, considering significance when  $p < 0.05$ .

### Supplementary Table 5

Analysis of the correlation coefficients regarding the association between the bioimpedance parameters and cardiometabolic variables and the atherogenic indexes in TS Subjects with MetS

|                             | FM       |          | PFM          |               | FFM          |               | PFFM         |                   | FFM to FM Ratio |               |
|-----------------------------|----------|----------|--------------|---------------|--------------|---------------|--------------|-------------------|-----------------|---------------|
|                             | <i>r</i> | <i>P</i> | <i>r</i>     | <i>P</i>      | <i>r</i>     | <i>p</i>      | <i>r</i>     | <i>p</i>          | <i>R</i>        | <i>p</i>      |
| Fasting Plasma Glucose      | -0.053   | 0.7618   | <b>-0.37</b> | <b>0.0289</b> | -0.21        | 0.22          | <b>-0.56</b> | <b>0.0005</b>     | -0.28           | 0.0976        |
| Triglycerides               | -0.073   | 0.6787   | 0.25         | 0.148         | -0.28        | 0.1045        | -0.27        | 0.1201            | -0.29           | 0.0872        |
| Total Cholesterol           | 0.028    | 0.871    | 0.098        | 0.5761        | <b>0.42</b>  | <b>0.0131</b> | <b>0.42</b>  | <b>0.012</b>      | 0.12            | 0.4836        |
| LDL-c                       | -0.016   | 0.9281   | 0.2          | 0.244         | <b>0.39</b>  | <b>0.0221</b> | <b>0.65</b>  | <b>&lt;0.0001</b> | -0.052          | 0.7653        |
| HDL-c                       | 0.04     | 0.8207   | -0.17        | 0.323         | <b>0.43</b>  | <b>0.0095</b> | <b>0.66</b>  | <b>&lt;0.0001</b> | 0.31            | 0.0709        |
| TC to HDL-c Ratio           | 0.13     | 0.4502   | 0.22         | 0.2074        | 0.13         | 0.4483        | 0.038        | 0.8305            | -0.028          | 0.8749        |
| Atherogenic Index of Plasma | 0.025    | 0.8846   | 0.13         | 0.4557        | <b>-0.46</b> | <b>0.0054</b> | <b>-0.39</b> | <b>0.0221</b>     | <b>-0.34</b>    | <b>0.05</b>   |
| LDL-c to HDL-c Ratio        | 0.26     | 0.1246   | 0.23         | 0.1749        | <b>-0.36</b> | <b>0.033</b>  | <b>-0.42</b> | <b>0.0123</b>     | <b>-0.41</b>    | <b>0.0149</b> |
| No-HDL-c to HDL-c Ratio     | 0.13     | 0.4502   | 0.22         | 0.2074        | 0.13         | 0.4483        | 0.038        | 0.8305            | -0.028          | 0.8749        |

*r* = correlation coefficient; values in **bold** and *italic* represent significant values; TS: Turner syndrome; MetS: Metabolic Syndrome; TC: Total Cholesterol; HDL-c: High Density Lipoprotein cholesterol; LDL-c: Low Density Lipoprotein cholesterol; FFM: Free fat mass; PFFM: Percentage of Free Fat Mass; FM: Fat Mass; PFM: Percentage of Fat Mass. TBW: Total Body Water. PTBW: Percentage of Total Body Water. The No-HDL-c is calculated as CT *minus* HDL-c. The Atherogenic Index of the Plasma is calculated through the formula of log(Triglycerides (mg/ml)/HDLc (mg/ml)). *Pearson* correlation or *Spearman* correlation (\*) test for the correlation between variables, considering significance when *p* < 0.05

**Deleted:** ¶

Page Break

¶

¶

¶

Page Break

¶

¶

¶

Page Break

¶
